# Supplementary material for: c-Myb Dominates TBK1-Mediated Endotoxin Tolerance in Kupffer Cells by Negatively Regulating DTX4
Source: Hindawi journal article supplement (doi:10.1155/2023/5990156), 2023-03-31

Fig S1

A

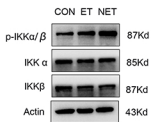

B

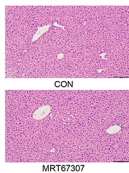

C

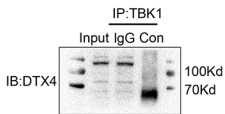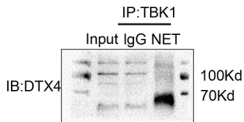

Supplement: f1 [file 5990156.f1.pdf]
